# Supplementary material for: Evolving impact of the COVID-19 pandemic in chronic dialysis recipients over the course of pandemic waves and COVID-19 vaccination rollout: a French national study
Source: bioRxiv or medRxiv preprint supplement (doi:10.1101/2024.04.05.24305315), 2024-06-05
Supplement: Supplementary file [file media-1.pdf]

## Supplementary material to "Assessing the evolving impact of the COVID-19 pandemic in chronic dialysis recipients along the wave subperiods and vaccination rollout: a French national study" by Leye E et al.

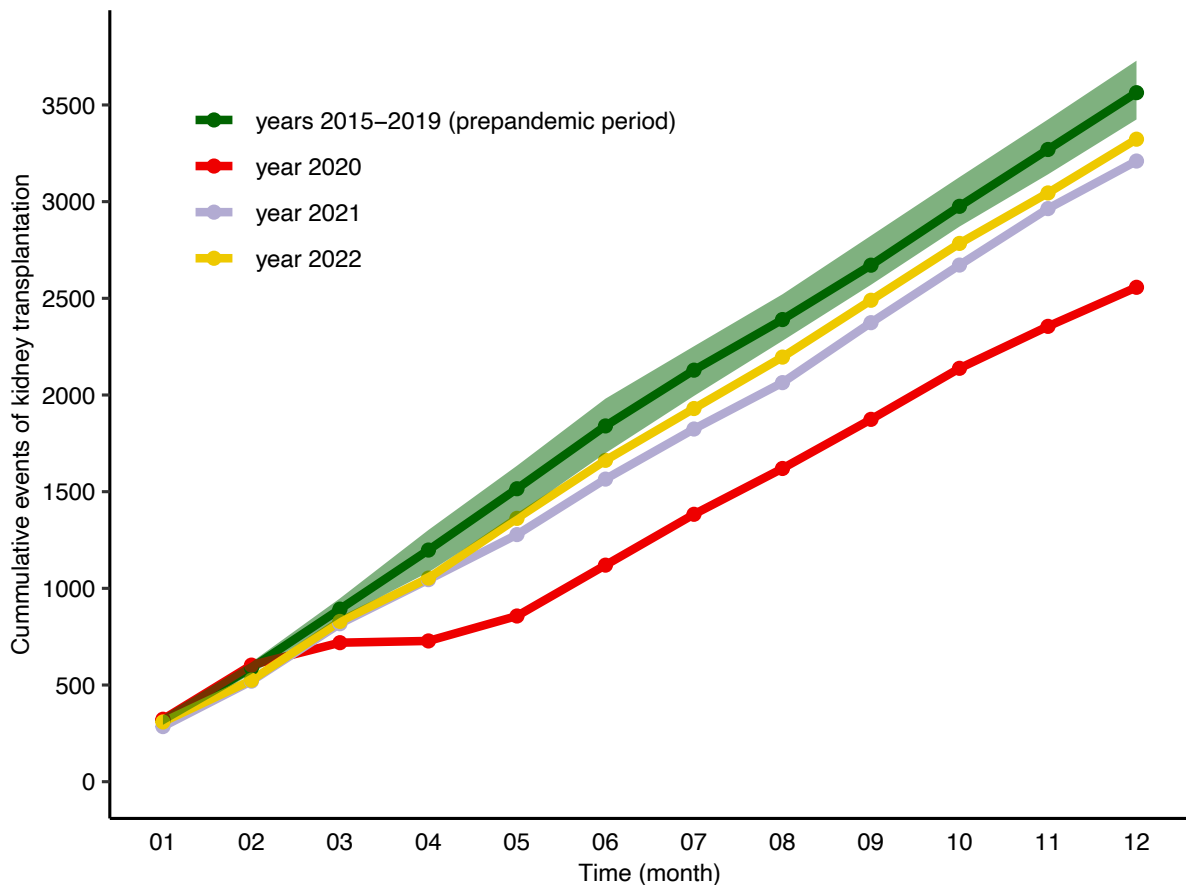

**Supplementary Figure S1: Kidney transplantation events among CDR in France in years 2015 to 2022.**

Prepandemic years (years 2015 to 2019) were pooled, and dark green solid line indicates the cumulative mean value observed each month considering the 5 corresponding years, while the light green area delineates the minimum and maximum observed range.

**Supplementary Table S1. Multivariable analysis of mortality in the 71,583 chronic dialysis patients and 143,166 matched controls during the prepandemic and pandemic periods.**

| <b>Variable</b> | <b>Variable value</b>       | <b>Deaths observed (n) / person-years (n)</b> | <b>HR [95% CI]</b> | <b>p value</b> |
|-----------------|-----------------------------|-----------------------------------------------|--------------------|----------------|
| Period          | Prepandemic                 | 25,353 / 330,116                              | 1 (reference)      |                |
|                 | Pandemic                    | 25,319 / 309225                               | 1.03 [1.00–1.06]   | 0.02           |
| Population      | Matched-control individuals | 22,285 / 454,432                              | 1 (reference)      |                |
|                 | CDR                         | 28,387 / 184,909                              | 3.15 [3.07–3.23]   | <0.01          |
| interaction     | Period × population         |                                               | 1.02 [0.98–1.05]   | 0.34           |

Abbreviations used: CI, confidence interval; HR, hazard ratio.

**Supplementary Table S2. Multivariable analysis of kidney transplantation events in the 71,583 chronic dialysis recipients of the study during the prepandemic and pandemic periods (Fine and Gray models).**

| Model    | Variable                                                        | Kidney transplantations (n) / person-years (n) | SHR [95% CI]     | p value |
|----------|-----------------------------------------------------------------|------------------------------------------------|------------------|---------|
| Model S1 | Prepandemic period                                              | 5,853 / 98,444                                 | 1 (reference)    |         |
|          | Pandemic period                                                 | 4,172 / 86,465                                 | 0.80 [0.77–0.83] | <0.01   |
| Model S2 | Prepandemic period                                              | 5,853 / 98,444                                 | 1 (reference)    |         |
|          | Pandemic period, no history of COVID-19-related hospitalization | 4,060 / 82,804                                 | 0.81 [0.78–0.85] | <0.01   |
|          | Pandemic period, ≥1 COVID-19-related hospitalization            | 112 / 3,661                                    | 0.56 [0.47–0.68] | <0.01   |
| Model S3 | Prepandemic period                                              | 5,853 / 98,444                                 | 1 (reference)    |         |
|          | 1 <sup>st</sup> wave                                            | 67 / 6,837                                     | 0.17 [0.13–0.21] | <0.01   |
|          | 1 <sup>st</sup> interwave                                       | 505 / 9,892                                    | 0.88 [0.81–0.97] | <0.01   |
|          | 2 <sup>nd</sup> wave                                            | 1,024 / 21,604                                 | 0.79 [0.74–0.85] | <0.01   |
|          | 2 <sup>nd</sup> interwave                                       | 874 / 17,503                                   | 0.84 [0.78–0.90] | <0.01   |
|          | 3 <sup>rd</sup> wave                                            | 673 / 13,075                                   | 0.83 [0.77–0.90] | <0.01   |
|          | 3 <sup>rd</sup> interwave                                       | 1,029 / 17,553                                 | 0.94 [0.88–1.00] | >0.01   |

All SHR shown correspond to Fine and Gray regression models also adjusted for the following covariates: sex, age category, diabetes, and cardiovascular disease. Abbreviations used: CI, confidence interval; SHR, subdistribution hazard ratio.

**Supplementary Table S3. Multivariable analysis of mortality in the 71,583 chronic dialysis recipients and 143,166 matched-control individuals of the study during the prepandemic and pandemic periods (Fine and Gray models).**

| Model    | Variable                                                           | Chronic dialysis recipients<br>Deaths observed<br>(n) / person-years<br>(n) | SHR [95% CI]     | p value | Matched-controls<br>individuals<br>Deaths observed<br>(n) / person-years<br>(n) | SHR [95% CI]     | p value |
|----------|--------------------------------------------------------------------|-----------------------------------------------------------------------------|------------------|---------|---------------------------------------------------------------------------------|------------------|---------|
| Model S4 | Prepandemic period                                                 | 14,455 / 98,444                                                             | 1 (reference)    |         | 10,898 / 231,672                                                                | 1 (reference)    |         |
|          | Pandemic period                                                    | 13,932 / 86,465                                                             | 1.14 [1.11–1.17] | <0.01   | 11,387 / 222,760                                                                | 1.08 [1.05–1.11] | <0.01   |
| Model S5 | Prepandemic period                                                 | 14,021 / 98,444                                                             | 1 (reference)    |         | 10,898 / 231,672                                                                | 1 (reference)    |         |
|          | Pandemic period, no history of<br>COVID-19-related hospitalization | 11,924 / 82,804                                                             | 1.03 [1.01–1.06] | 0.01    | 10,110 / 220,149                                                                | 0.99 [0.95–1.01] | 0.31    |
|          | Pandemic period, ≥1 COVID-19-<br>related hospitalization           | 2,008 / 3,661                                                               | 3.56 [3.38–3.74] | <0.01   | 1,277 / 2,611                                                                   | 7.58 [7.11–8.08] | <0.01   |
| Model S6 | Prepandemic period                                                 | 14,455 / 98,444                                                             | 1 (reference)    |         | 10,898 / 231,672                                                                | 1 (reference)    |         |
|          | 1 <sup>st</sup> wave                                               | 1,235 / 6,837                                                               | 1.30 [1.22–1.37] | <0.01   | 1,036 / 17,386                                                                  | 1.27 [1.19–1.35] | <0.01   |
|          | 1 <sup>st</sup> interwave                                          | 1,391 / 9,892                                                               | 0.98 [0.92–1.03] | 0.41    | 1,075 / 25,117                                                                  | 0.90 [0.84–0.95] | <0.01   |
|          | 2 <sup>nd</sup> wave                                               | 3,860 / 21,604                                                              | 1.26 [1.22–1.31] | <0.01   | 3,234 / 55,077                                                                  | 1.24 [1.19–1.29] | <0.01   |
|          | 2 <sup>nd</sup> interwave                                          | 2,552 / 17,503                                                              | 1.03 [0.98–1.07] | 0.22    | 1,966 / 44,564                                                                  | 0.93 [0.89–0.98] | <0.01   |
|          | 3 <sup>rd</sup> wave                                               | 2,208 / 13,075                                                              | 1.18 [1.13–1.23] | <0.01   | 1,843 / 33,764                                                                  | 1.16 [1.10–1.22] | <0.01   |
|          | 3 <sup>rd</sup> interwave                                          | 2,686 / 17,554                                                              | 1.10 [1.05–1.14] | <0.01   | 2,233 / 46,852                                                                  | 1.00 [0.96–1.05] | 0.93    |

All SHR shown correspond to Fine and Gray regression models also adjusted for the following covariates: sex, age category, diabetes, and cardiovascular disease. Abbreviations used: CI, confidence interval; SHR, subdistribution hazard ratio.

**Supplementary Table S4. Multivariable analysis of COVID-19 hospitalization after a given number of vaccine doses received in the chronic dialysis recipients and matched-control individuals (Fine and Gray model).**

| Number of vaccine doses            | Chronic dialysis recipients                                    |                  |         | Matched-controls individuals                                   |                  |         |
|------------------------------------|----------------------------------------------------------------|------------------|---------|----------------------------------------------------------------|------------------|---------|
|                                    | Persons with a COVID-19 hospitalization (n) / person-years (n) | SHR [95% CI]     | p value | Persons with a COVID-19 hospitalization (n) / person-years (n) | SHR [95% CI]     | p value |
| 0 or 1                             | 3,006 / 39,494                                                 | 1 (reference)    |         | 2,397 / 116,699                                                | 1 (reference)    |         |
| 2 (vs. ≤ 1)                        | 351 / 12,149                                                   | 0.36 [0.32–0.41] | <0.01   | 264 / 42,935                                                   | 0.29 [0.25–0.33] | <0.01   |
| 3 (1 <sup>st</sup> booster, vs. 2) | 618 / 19,430                                                   | 0.66 [0.58–0.76] | <0.01   | 486 / 49,045                                                   | 0.68 [0.57–0.80] | <0.01   |
| 4 (2 <sup>nd</sup> booster, vs. 3) | 396 / 6,915                                                    | 0.76 [0.68–0.87] | <0.01   | 113 / 8,554                                                    | 0.82 [0.65–1.03] | 0.08    |

All SHR shown correspond to Fine and Gray regression models also adjusted for the following covariates: sex, age category, diabetes, cardiovascular disease, and waves and interwaves subperiods; they are reported per additional vaccine dose (i.e. 2 vs. ≤ 1, 3 vs. 2, and 4 vs. 3, respectively). Abbreviations used: CI, confidence interval; SHR, subdistribution hazard ratio.

**Supplementary Table S5. Multivariable analysis of survival after a given number of vaccine doses received in the chronic dialysis recipients and matched-control individuals (Fine and Gray model).**

| Number of vaccine doses            | Chronic dialysis recipients            |                  |         | Matched-controls individuals           |                  |         |
|------------------------------------|----------------------------------------|------------------|---------|----------------------------------------|------------------|---------|
|                                    | Deaths observed (n) / person-years (n) | SHR [95% CI]     | p value | Deaths observed (n) / person-years (n) | SHR [95% CI]     | p value |
| 0 or 1                             | 7,137 / 41,084                         | 1 (reference)    |         | 6,651 / 118,095                        | 1 (reference)    |         |
| 2 (vs. ≤ 1)                        | 2,246 / 12,960                         | 0.81 [0.77–0.86] | <0.01   | 1,949 / 43,567                         | 0.65 [0.61–0.69] | <0.01   |
| 3 (1 <sup>st</sup> booster, vs. 2) | 2,683 / 20,320                         | 0.56 [0.53–0.60] | <0.01   | 2,174 / 49,501                         | 0.61 [0.53–0.66] | <0.01   |
| 4 (2 <sup>nd</sup> booster, vs. 3) | 1,638 / 10,548                         | 0.88 [0.82–0.94] | <0.01   | 581 / 11,159                           | 0.80 [0.73–0.89] | <0.01   |

All SHR shown correspond to Fine and Gray regression models also adjusted for the following covariates: sex, age category, diabetes, cardiovascular disease, and waves and interwaves subperiods; they are reported per additional vaccine dose (i.e. 2 vs. ≤ 1, 3 vs. 2, and 4 vs. 3, respectively). Abbreviations used: CI, confidence interval; SHR, subdistribution hazard ratio.
